# Supplementary material
Source: PubMed Central journal article supplement (PMC5665732)
Supplement: NIHMS876905-supplement.pdf [file NIHMS876905-supplement.pdf]

**Supplementary material for**  
**NADH reduction of nitroaromatics as a probe for residual high-spin ferric form in a**  
**cytochrome P450**

Thomas C. Pochapsky<sup>1\*</sup>, Nathan Wong<sup>2</sup>, Yihao Zhuang<sup>2</sup>, Jeffrey Fitcher<sup>1</sup>, Maria-Eirini  
Pandelia<sup>2</sup>, Drew R. Teitz<sup>1</sup> and Allison M. Colthart<sup>2</sup>

Departments of <sup>1</sup>Chemistry and <sup>2</sup>Biochemistry,

Brandeis University

415 South St.

Waltham, MA 02454-9110 USA

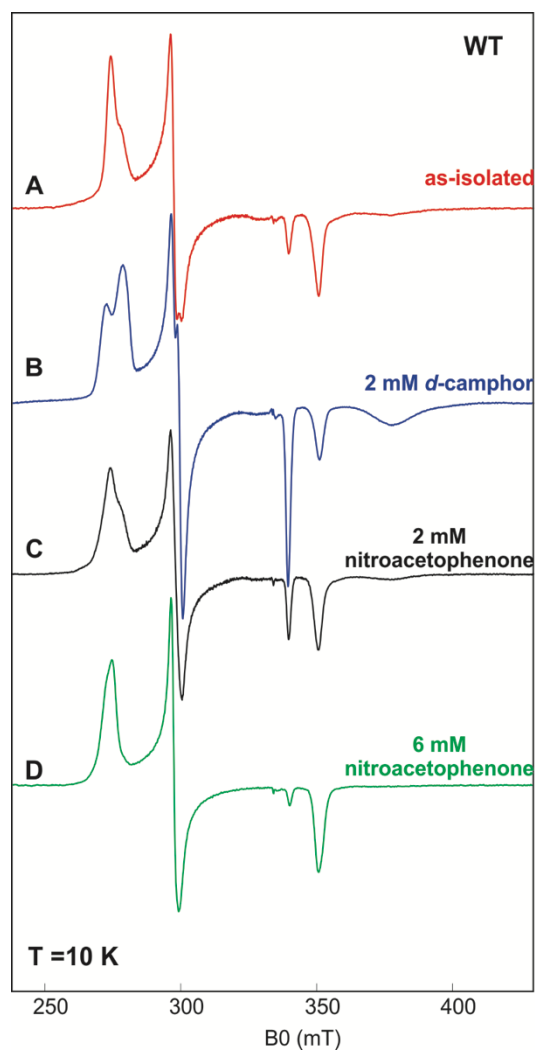

**Figure S1.** CW EPR spectra of WT CYP101A1 under different conditions. (A) 337  $\mu\text{M}$  substrate free WT CYP101A1 (red trace “as isolated”), (B) 327  $\mu\text{M}$  of WT CYP101A1 with 2 mM *d*-camphor **1** (blue trace), bottom, (C) 331  $\mu\text{M}$  of WT CYP101A1 with 2 mM nitroacetophenone **6** (black trace), (D) 320  $\mu\text{M}$  of WT CYP101A1 with 6 mM nitroacetophenone **6** (green trace). Experimental conditions: temperature 10 K, microwave power = 2 mW, microwave frequency = 9.384 GHz, modulation amplitude = 1 mT.

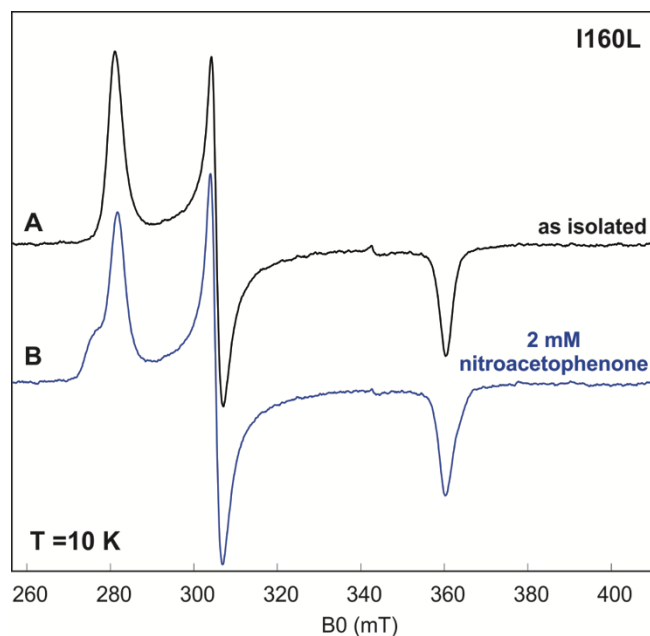

**Figure S2.** CW EPR spectra of I160L CYP101A1 under different conditions. (A) 300  $\mu\text{M}$  of substrate-free I160L CYP101A1 (B) 300  $\mu\text{M}$  of I160L CYP101A1 with 2 mM *m*-nitroacetophenone **6**. Experimental conditions: temperature 10 K, microwave power = 2 mW, microwave frequency = 9.625 GHz, modulation amplitude = 1 mT.

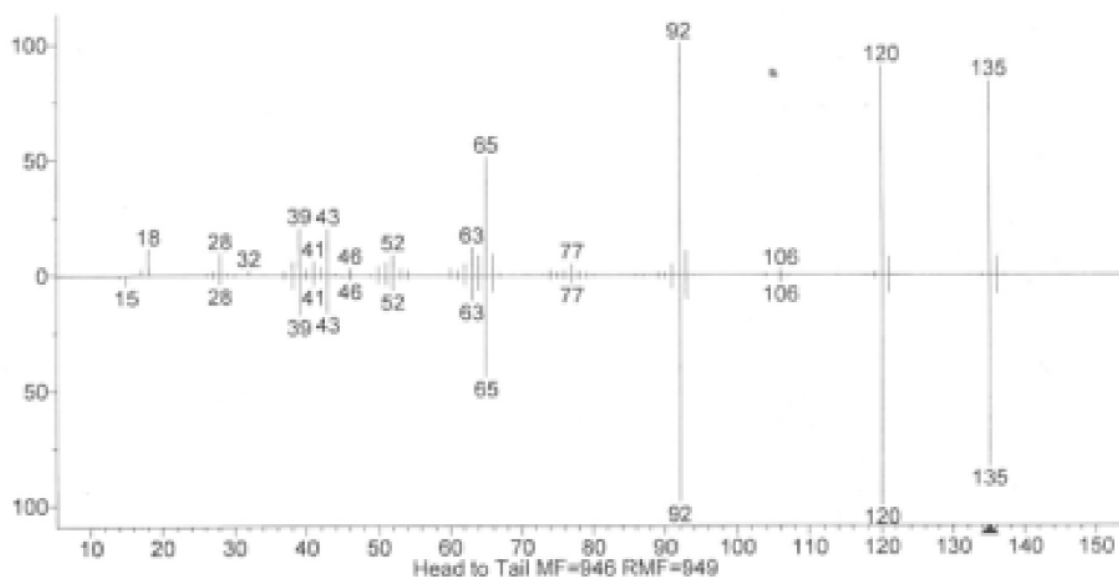

**Figure S3.** Comparison of mass spectrum of Nrase product **7a** (top) with that of genuine *m*-aminoacetophenone (bottom).

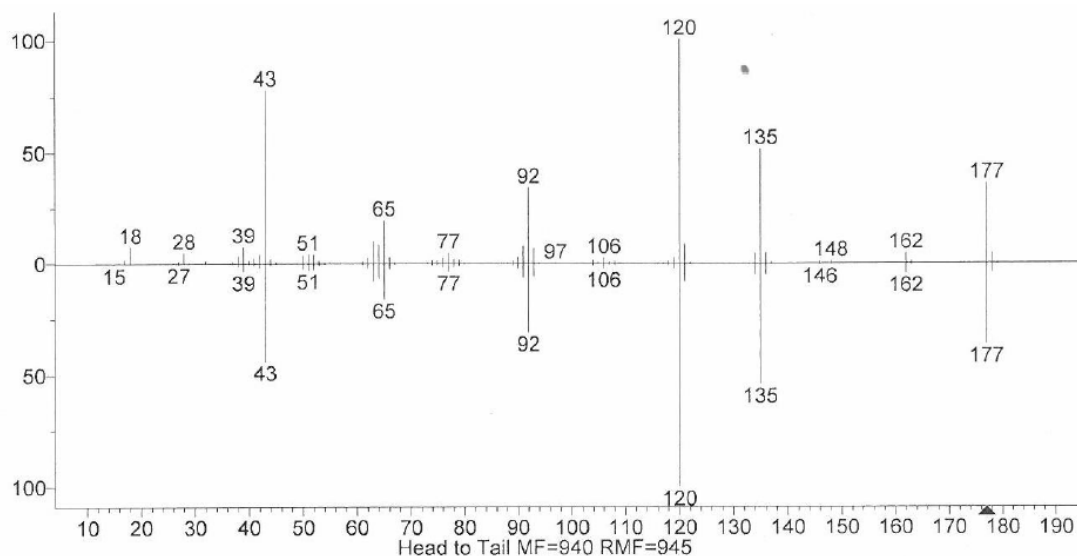

**Figure S4.** Comparison of mass spectrum of post-column product **7b** (top) with that of genuine *m*-(N-acetyl)-aminoacetophenone (bottom).
